# Supplementary material
Source: PubMed Central journal article supplement (PMC1913792)
Supplement: plntphys_pp.106.094995_1.pdf [file plntphys_pp.106.094995_1.pdf]

## **Supplementary material**

Table S1: Complete dataset of EST counts for the CAZy set of loci from which the summaries in Tables I and II are derived.

Table S2: Complete dataset of EST counts for the complete set of loci defined as encoding putative membrane proteins derived from Aramemnon, excluding those in the CAZy set. Table III contains data for one group taken from this.

Table S3: Sensitivity of results in Table I to choosing subsets of ESTs based on tissue and stage annotation.
